# Supplementary material
Source: PubMed Central journal article supplement (PMC10051065)
Supplement: jama-e230636-s001.pdf [file jama-e230636-s001.pdf]

## Supplemental Online Content

1

2

3 Cheng T-YD, Ferderber C, Kinder B, Wei Y-JJ. Trends in dietary vitamin A intake among US  
4 adults by race and ethnicity, 2003-2018. *JAMA*. Published March 28, 2023.  
5 doi:10.1001/jama.2023.0636

6

7 **eAppendix.** Supplementary Methods

8 **eReferences**

9

10 This supplemental material has been provided by the authors to give readers additional  
11 information about their work.

12

13

## 14 **eAppendix. Supplementary Methods**

15

### 16 **Dietary Assessment in the National Health and Nutrition Examination Survey (NHANES)**

17

18 Dietary intake data collection was conducted in the NHANES interview component called What  
19 We Eat in America (WWEIA). The 24-hour recall method was used to estimate the types and  
20 amounts of foods and beverages consumed during the 24-hour period prior to the interview  
21 (midnight to midnight) and to estimate the intake of energy, nutrients, and other food  
22 components from those foods and beverages. The first day (day 1) data were collected in the  
23 Mobile Examination Center (MEC) and, from the 2003-2004 cycle, the second day (day 2) data  
24 were collected through a telephone interview scheduled 3 to 10 days later. In 2003-2004, 87%  
25 of MEC participants had day 2 dietary data. A set of standard measuring guides (measuring  
26 cups and spoons, a ruler, and a food model booklet) was available in the MEC dietary interview  
27 room for the respondent to use to report amounts of food. After completing the in-person  
28 interview, the measuring guides were given to participants for reporting food and beverage  
29 amounts during the ensuing telephone interview. There was a change in the measuring guides  
30 in 2002.<sup>1</sup> In addition, dietary intake data were collected using the NHANES computer-assisted  
31 dietary interview system (CADI) in 2001 and earlier.<sup>2</sup> In 2002 and all later cycles, WWEIA data  
32 were collected using the dietary data collection instrument created by the US Department of  
33 Agriculture, the Automated Multiple-Pass Method (AMPM).<sup>3</sup> AMPM is a fully computerized recall  
34 method that includes an extensive compilation of standardized food-specific questions and  
35 possible response options. It features automated routing of questions based on previous  
36 answers. AMPM has a 5-step interview: (1) quick list, (2) forgotten foods, (3) time and occasion,  
37 (4) detail cycle, and (5) final probe. AMPM is updated yearly to capture the changing food  
38 supply and to address research needs from the data user community.

39

40 NHANES data prior to the 2003-2004 cycle, including NHANES III (1988-1994) and the 1999-  
41 2000 cycle, were not included in the present study because the dietary vitamin A intake levels  
42 were captured in microgram retinol equivalents, an older unit, and the conversion to microgram  
43 retinol activity equivalents, which was used in the later NHANES cycles, was not feasible. In  
44 addition, because of changes in the instruments used (the measuring guides; CADI vs AMPM)  
45 in 2002, the present study reported data points only from the 2003-2004 cycle and onward.

46

47

### 48 **Regression Method**

49

50 The distribution of vitamin A was examined. Gamma generalized linear regression models were  
51 used to estimate mean vitamin A intake of the day 1 recall and the differences among the race  
52 groups, with adjustment for confounders through propensity score stratification per NHANES  
53 cycle using SAS. The MEC exam weight in each cycle was applied for population estimates.  
54 The intake levels within each racial group by NHANES cycles were examined using simple  
55 linear regression; whether the slope deviated from zero was used as a trend test. Racial group  
56 differences were estimated using Stata.

57

58

### 59 **Covariates**

60

61 A variable was considered as a covariate if it fulfilled a definition of confounder, i.e., associated  
62 with both exposure and outcomes, but not in the causal pathway based on biological knowledge  
63 and literature. The covariates and the corresponding levels were sex (male, female), age group  
64 (20-39, 40-59, ≥60 y), educational level (<grade 9, grades 9-11, high school graduate or

65 General Educational Development [GED], some college or advanced degree, ≥college  
66 graduate), marital status (married; divorced, widowed, or separated; never married), family  
67 income to poverty ratio (0 to <1, 1 to <2, 2 to <3, 3 to <4, 4 to <5, ≥5), body mass index (<25, 25  
68 to <30, ≥30 kg/m<sup>2</sup>), smoking status (current, former, never), physical activity (yes for any  
69 moderate or vigorous activity, otherwise no), total energy intake (continuous value), and history  
70 of cancer (yes, no [included “Refused” and “Don’t know”]), arthritis (yes, no), congestive heart  
71 disease (yes, no), “heart attack” (yes, no), diabetes (yes, no), “thyroid problem” (yes no), and  
72 stroke (yes, no).

73  
74  
75

## 76 **eReferences**

- 77 1. National Health and Nutrition Examination Survey, Measuring Guides for the Dietary  
78 Recall Interview. Accessed December 3, 2022.  
79 [https://www.cdc.gov/nchs/nhanes/measuring\\_guides\\_dri/measuringguides.htm](https://www.cdc.gov/nchs/nhanes/measuring_guides_dri/measuringguides.htm)
- 80 2. National Health and Nutrition Examination Survey, 2001-2002 Data Documentation,  
81 Codebook, and Frequencies. Accessed December 3, 2022.  
82 [https://wwwn.cdc.gov/Nchs/Nhanes/2001-2002/DRXTOT\\_B.htm](https://wwwn.cdc.gov/Nchs/Nhanes/2001-2002/DRXTOT_B.htm)
- 83 3. National Health and Nutrition Examination Survey, 2003-2004 Data Documentation,  
84 Codebook, and Frequencies. Accessed December 3, 2022.  
85 [https://wwwn.cdc.gov/Nchs/Nhanes/2003-2004/DR1TOT\\_C.htm](https://wwwn.cdc.gov/Nchs/Nhanes/2003-2004/DR1TOT_C.htm)

86
