# Supplementary material
Source: PubMed Central journal article supplement (PMC10051065)
Supplement: jama-e230636-s002.pdf [file jama-e230636-s002.pdf]

Cheng T-YD, Ferderber C, Kinder B, Wei Y-JJ. Trends in dietary vitamin A intake among US adults by race and ethnicity, 2003-2018. *JAMA*. Published March 28, 2023.  
doi:10.1001/jama.2023.0636

## Data Sharing Statement

### Data

**Data available:** Yes

**Data types:** Deidentified participant data, Other (please specify)

**Additional Information:** NHANES data are deidentified and publicly available.

**How to access data:** All data are publicly available at

<https://www.cdc.gov/nchs/nhanes/index.htm>

**When available:** With publication

### Supporting Documents

**Document types:** None

### Additional Information

**Who can access the data:** All data are publicly available to all researchers.

**Types of analyses:** For any purpose

**Mechanisms of data availability:** All data are publicly available to all researchers.

**Any additional restrictions:** N/A
